# Supplementary material
Source: PubMed Central journal article supplement (PMC3706580)
Supplement: NIHMS468895-supplement-Supp_Fig_S1-S11.pdf [file NIHMS468895-supplement-Supp_Fig_S1-S11.pdf]

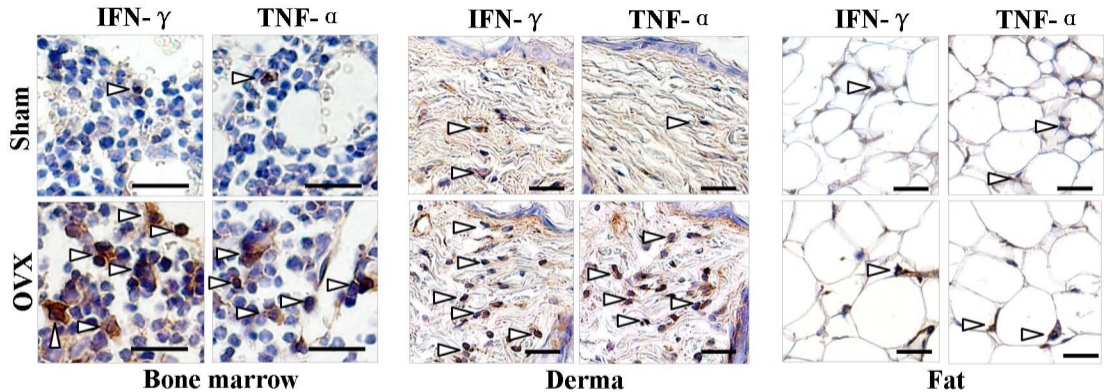

Songtao Shi

Figure S1

**CD105**

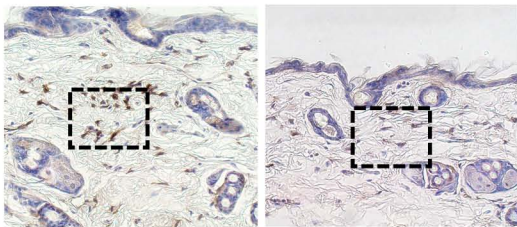

**CD44**

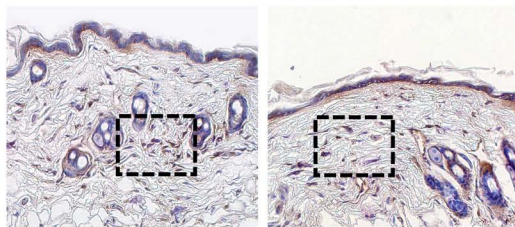

**CD73**

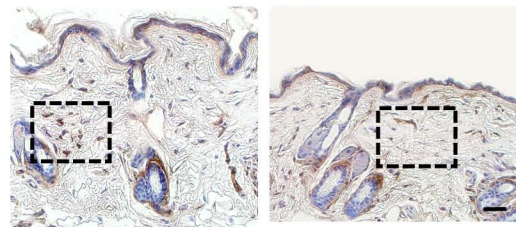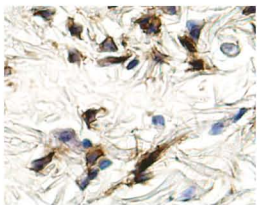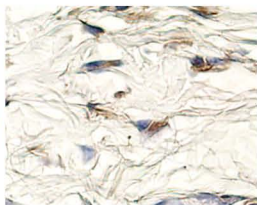

**Sham**

**OVX**

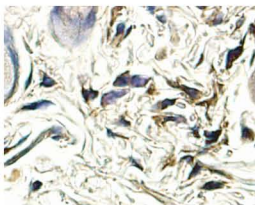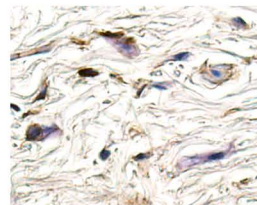

**Sham**

**OVX**

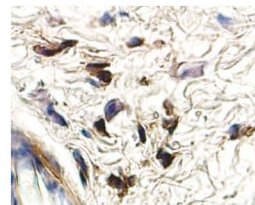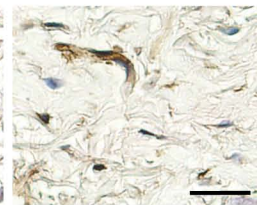

**Sham**

**OVX**

**A**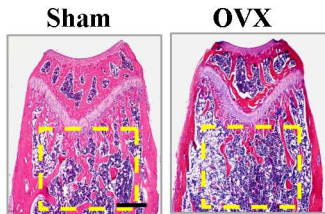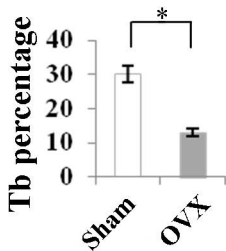**B**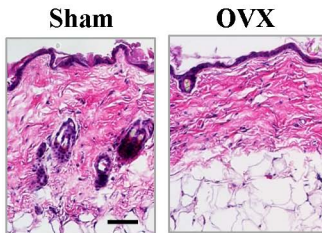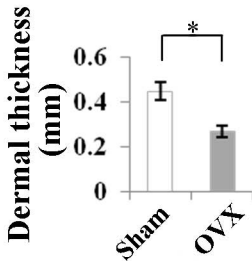

**A**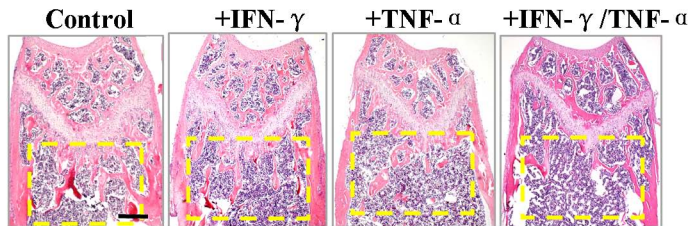**B**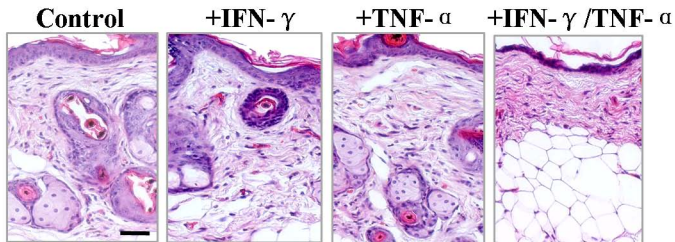

**A**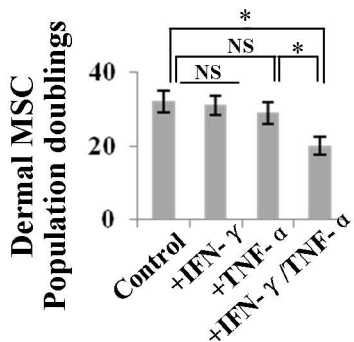**B**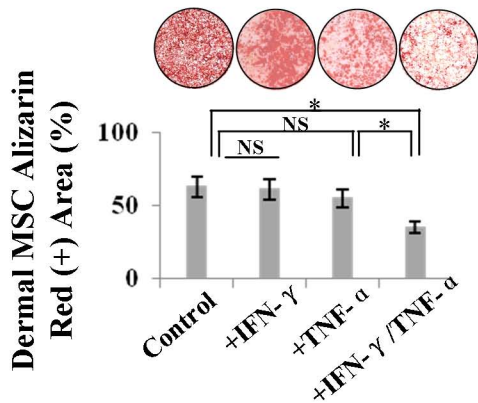**C**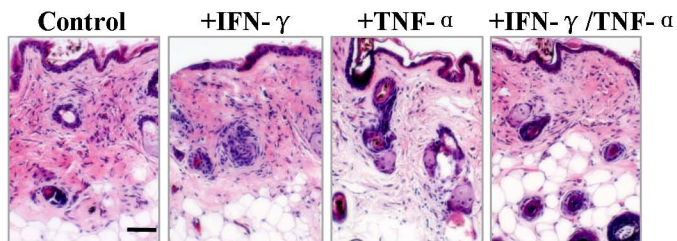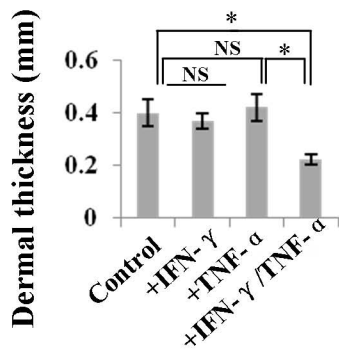

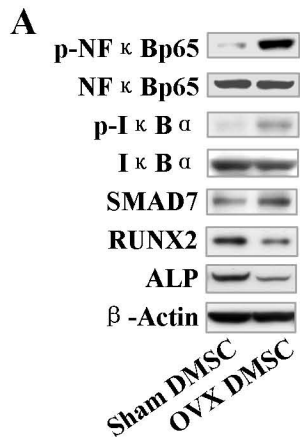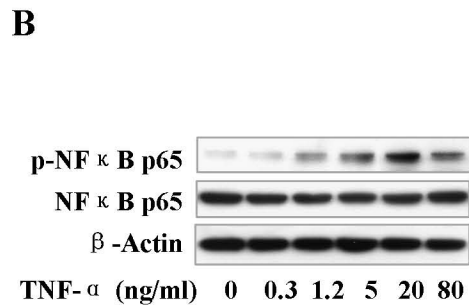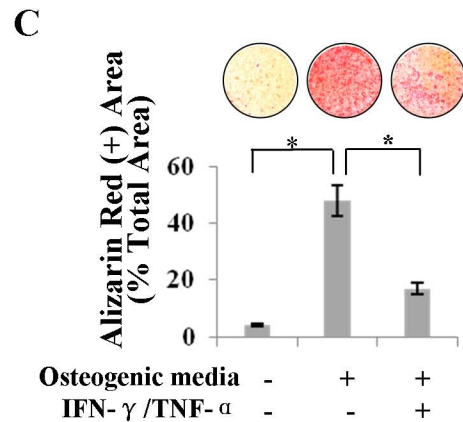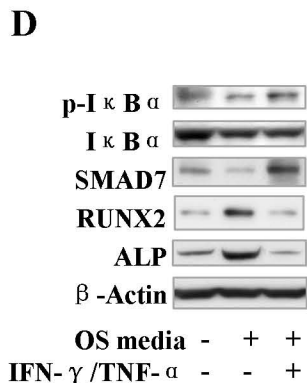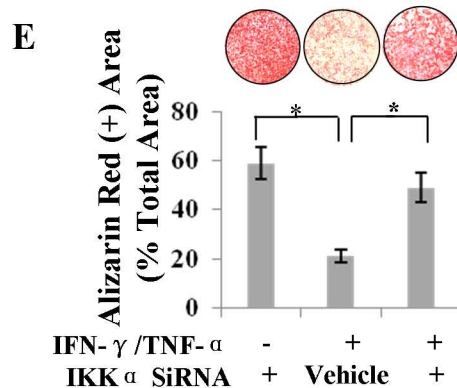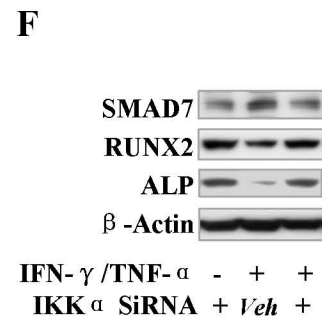

**A**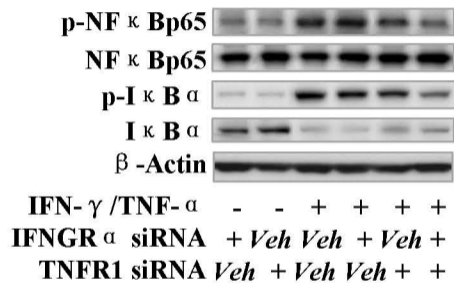**B**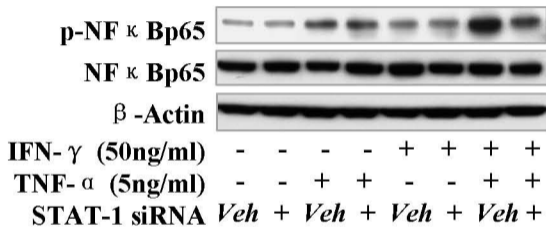**C**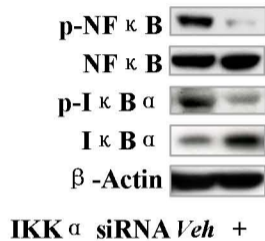**D**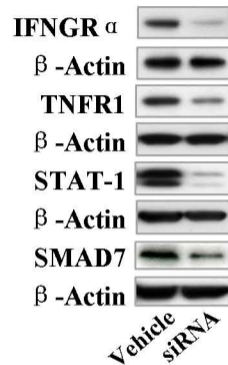

Songtao Shi

Figure S7

**A**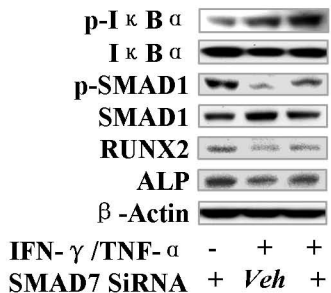**B**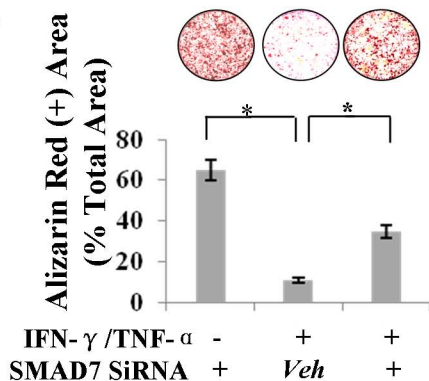*Dermal MSCs***C**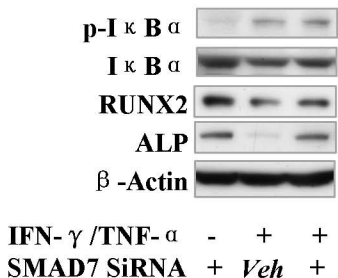**D**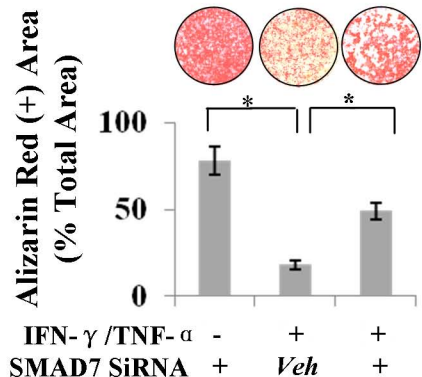**Figure S8.** Songtao Shi



**A****Pan-CK**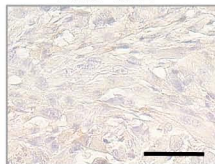**B****VIM**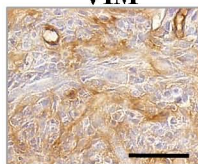**Pan-CK**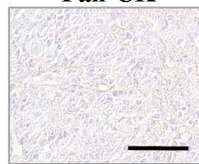**PCNA**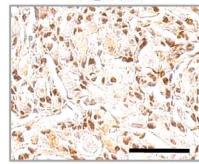**C****p-NFkB****c-FOS****c-MYC****Sham**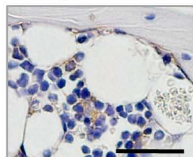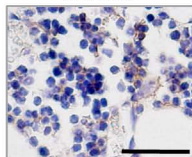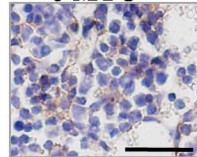**OVX**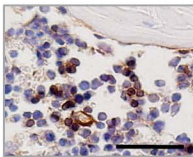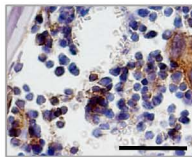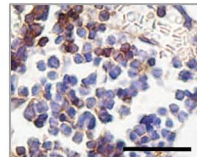

**A**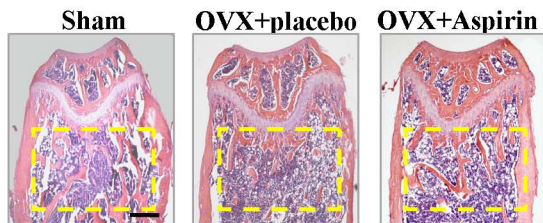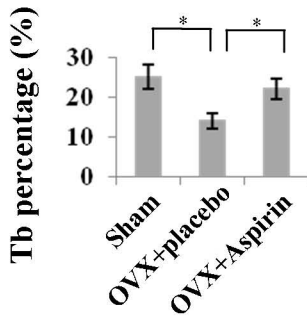**B**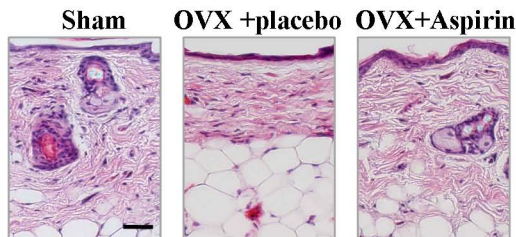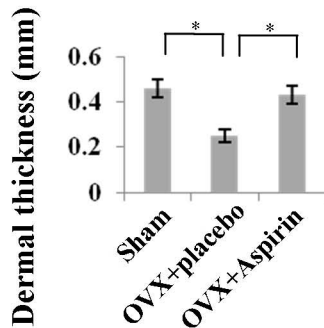

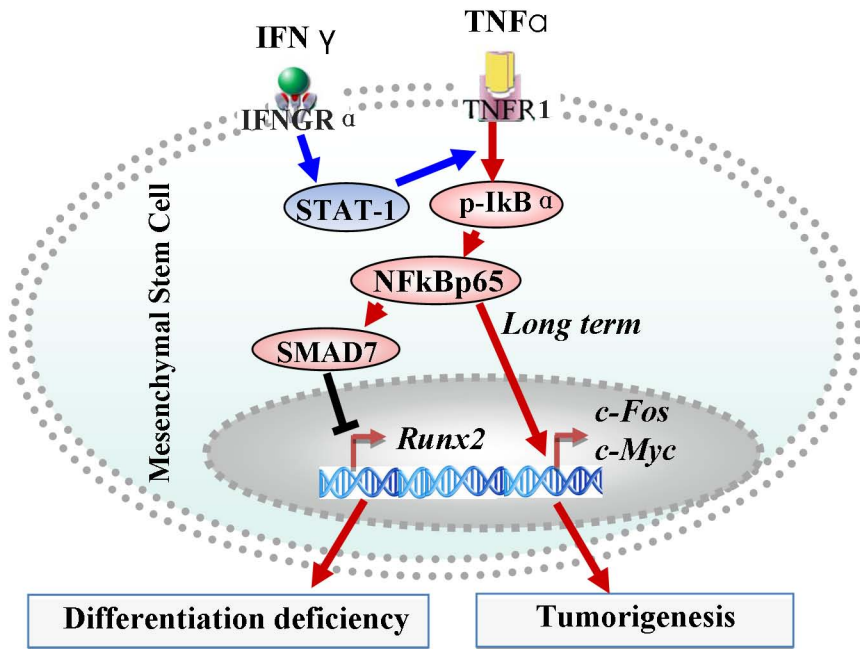

Songtao Shi Figure S11
